# Supplementary material for: Effective Adsorption of a-series Chemical Warfare Agents on Graphdiyne Nanoflake; A DFT&nbsp;Study
Source: Research Square preprint supplement (doi:10.21203/rs.3.rs-209734/v1), 2021-02-10
Supplement: Supplementary file 1 [file 7e46d79b5efe19162dcbd262.docx]

**Effective adsorption of A-series chemical warfare agents on graphdiyne nanoflake; a DFT study**

Hasnain Sajid#, Sidra Khan#, Khurshid Ayub, Tariq Mahmood*

*Department of Chemistry, COMSATS University, Abbottabad Campus, Abbottabad-22060, Pakistan*

*To whom correspondence can be addressed: E-mail: mahmood@cuiatd.edu.pk (T. M)

# Hasnain Sajid & Sidra Khan have equal contributions for first authorship

| **A-230** | **A-232** | **A-234** |
| --- | --- | --- |

**Fig. S1**: Structure of A-series (A-230, A-232m A-234) reported by Hoenig.

**Fig S2a.** All possible optimized geometries of **A230@GDY** complexes.

**Fig S2b.** All possible optimized geometries of **A232@GDY** complexes.

**Fig S2c.** All possible optimized geometries of **A234@GDY** complexes

**Fig S3.** UV-Vis spectra of A-series analytes@GDY complexes.
